# Supplementary material for: Foot fracture may predict poor patient reported functional outcomes in lower extremity reconstruction of the traumatically injured lower extremity: A case-control study.
Source: Research Square preprint supplement (doi:10.21203/rs.3.rs-455697/v1), 2021-05-05
Supplement: Supplementary file 3 [file 5cc8adda04dbd0a4e32ec971.xlsx]

## Sheet: Table 1
Table 1. Patient demographics and comorbidities of all patients that participated in the LEFS and SF36 questionnaires.
	Foot Fracture	No Foot Fracture	Responders	Nonresponders	All Patients	P-Value (Foot Fracture vs. No Foot Fracture)	P-Value (Responders vs. Nonresponders)
N (Patients)	4	17	21	42	63
Mean Age	32.8 ± 11.3	38.1 ± 13.3	37.1 ± 12.8	35.0 ± 15.1	35.7 ± 14.3	0.45	0.58
BMI	29.2 ± 5.9	30.0 ± 7.9	29.8 ± 7.4	26.7 ± 5.2	27.7 ± 6.1	0.83	0.11
Male (% Total)	4 (100%)	15 (88%)	19 (90%)	35 (83%)	54 (86%)
Comorbidities
Smoker	1 (25%)	4 (24%)	5 (24%)	17 (40%)	22 (35%)	1	0.26
Hypertension	1 (25%)	2 (12%)	3 (14%)	2 (5%)	6 (10%)	0.49	0.32
Diabetes	0 (0%)	1 (6%)	1 (5%)	1 (2%)	2 (3%)	1	1
ASA Classification
ASA 1	0 (0%)	6 (35%)	6 (29%)	15 (36%)	21 (33%)	0.28	0.78
ASA 2	3 (75%)	6 (35%)	9 (43%)	23 (55%)	32 (51%)	0.27	0.43
ASA 3	1 (25%)	4 (24%)	5 (24%)	2 (5%)	7 (11%)	1	0.04*
ASA 4	0 (0%)	1 (6%)	1 (5%)	2 (5%)	3 (5%)	1	1
± Denotes 95% confidence interval of data.
