# Supplementary material for: Foot fracture may predict poor patient reported functional outcomes in lower extremity reconstruction of the traumatically injured lower extremity: A case-control study.
Source: Research Square preprint supplement (doi:10.21203/rs.3.rs-455697/v1), 2021-05-05
Supplement: Supplementary file 6 [file 9eed79cec2bfbd53257ba292.xlsx]

## Sheet: Table 6
Table 6. LEFS functional outcomes scores among those with foot fractures and no foot fracture, in comparison to all respondants to the survey.
LEFS Question	Foot Fracture	No Foot Fracture	All Responders	P-Value
Any of your usual work, housework, or school activities.	1.3 ± 0.5	1.9 ± 1.2	1.8 ± 1.2	0.1
Your usual hobbies, recreational or sporting activities.	1.5 ± 1.0	1.6 ± 1.4	1.6 ± 1.3	0.89
Getting into or out of the bath.	2.3 ± 1.0	2.4 ± 1.0	2.3 ± 1.0	0.86
Walking between rooms.	1.3 ± 1.0	2.7 ± 1.2	2.4 ± 1.2	0.04*
Putting on your shoes or socks.	1.0 ± 1.4	2.7 ± 1.2	2.4 ± 1.4	0.09
Squatting	0.3 ± 0.5	0.9 ± 1.1	0.8 ± 1.0	0.08
Lifting an object, like a bag of groceries from the floor.	2.0 ± 1.2	2.2 ± 1.6	2.2 ± 1.5	0.61
Performing light activities around your home.	2.0 ± 0.8	2.8 ± 1.1	2.6 ± 1.1	0.17
Performing heavy activities around your home.	1.8 ± 1.5	1.7 ± 1.0	1.7 ± 1.1	0.96
Getting into or out of a car.	1.8 ± 1.3	2.6 ± 1.1	2.4 ± 1.2	0.29
Walking 2 Blocks	1.0 ± 0.0	2.1 ± 1.4	1.9 ± 1.4	0.01*
Walking 1 Mile	0.8 ± 1.0	1.4 ± 1.5	1.2 ± 1.4	0.35
Going up or down 10 stairs (about 1 flight of stairs).	1.5 ± 1.0	1.7 ± 1.3	1.7 ± 1.2	0.74
Standing for 1 hour.	1.0 ± 1.2	1.5 ± 1.5	1.4 ± 1.4	0.47
Sitting for 1 hour.	1.3 ± 1.5	3.1 ± 1.1	2.7 ± 1.3	0.09
Running on even ground.	0.0 ± 0.0	0.7 ± 1.4	0.6 ± 1.2	0.05*
Running on uneven ground.	0.0 ± 0.0	0.5 ± 1.1	0.4 ± 1.0	0.09
Making sharp turns while running fast.	0.0 ± 0.0	0.4 ± 0.9	0.3 ± 0.9	0.09
Hopping	0.5 ± 1.0	0.5 ± 1.2	0.5 ± 1.1	0.96
Rolling over in bed.	2.8 ± 1.0	2.9 ± 1.2	2.9 ± 1.1	0.82
Total	23.8 ± 5.9	36.2 ± 19.2	33.9 ± 18.0	0.04*
