# Supplementary material for: Foot fracture may predict poor patient reported functional outcomes in lower extremity reconstruction of the traumatically injured lower extremity: A case-control study.
Source: Research Square preprint supplement (doi:10.21203/rs.3.rs-455697/v1), 2021-05-05
Supplement: Supplementary file 8 [file 153c9e73a080e016f830aae0.xlsx]

## Sheet: Table 4
Table 4. Characteristics of patients with foot fractures (n = 4).
	Age	Gender	Injury Mechanism	Foot Fractures	Flap Type
Patient 1	32	M	Motorcycle Accident	Navicular, Metatarsal	Latissimus
Patient 2	25	M	Motorcycle Accident	Calcaneus	Latissimus
Patient 3	25	M	Motorcycle Accident	Metatarsal	Rectus Abdominus Myocutaneous
Patient 4	42	M	Auto versus Pedestrian	Calcaneus	Rectus Abdominus Myocutaneous
