# Supplementary material for: Foot fracture may predict poor patient reported functional outcomes in lower extremity reconstruction of the traumatically injured lower extremity: A case-control study.
Source: Research Square preprint supplement (doi:10.21203/rs.3.rs-455697/v1), 2021-05-05
Supplement: Supplementary file 9 [file 27a29ced71dbbc4def870471.xlsx]

## Sheet: Table 2
Table 2. Injury characteristics across all patients that participated in the LEFS and SF36 questionnaires.
	Foot Fracture	No Foot Fracture	Responders	Nonresponders	All Patients	P-Value (Foot Fracture vs. No Foot Fracture)	P-Value (Responders vs. Nonresponders)
Injury Mechanism
Auto Versus Pedestrian	0 (0%)	4 (24%)	4 (19%)	15 (36%)	19 (30%)	0.55	0.25
Motor Vehicle Accident	0 (0%)	2 (12%)	2 (10%)	11 (26%)	13 (21%)	1	0.19
Motorcycle Collision	3 (75%)	7 (41%)	10 (48%)	9 (21%)	19 (30%)	0.31	0.04*
Fall	1 (25%)	2 (12%)	3 (14%)	4 (10%)	7 (11%)	0.49	0.68
Gunshot Wound	0 (0%)	0 (0%)	0 (0%)	2 (5%)	2 (3%)	N/A	0.55
Crush	0 (0%)	1 (6%)	1 (5%)	1 (2%)	2 (3%)	1	1
Blast	0 (0%)	1 (6%)	1 (5%)	0 (0%)	1 (2%)	1	0.33
Lower Extremity Vascular Injury	0 (0%)	5 (29%)	5 (24%)	10 (24%)	15 (24%)	0.53	1
Vascular Injury Repair	0 (0%)	3 (18%)	3 (14%)	4 (10%)	7 (11%)	1	0.68
Contralateral Lower Extremity Fracture	0 (0%)	2 (12%)	2 (10%)	7 (17%)	9 (14%)	1	0.71
Hip Fracture	0 (0%)	0 (0%)	0 (0%)	2 (5%)	2 (3%)	N/A	0.55
Femur Fracture	1 (25%)	2 (12%)	3 (14%)	7 (17%)	10 (16%)	0.49	1
Definitive Fixation
Plate/Screws	4 (100%)	10 (59%)	14 (67%)	15 (36%)	29 (46%)	0.26	0.03*
Intermedullary Nail	0 (0%)	7 (41%)	7 (33%)	27 (64%)	34 (54%)	0.26	0.03*
