# Supplementary material for: Foot fracture may predict poor patient reported functional outcomes in lower extremity reconstruction of the traumatically injured lower extremity: A case-control study.
Source: Research Square preprint supplement (doi:10.21203/rs.3.rs-455697/v1), 2021-05-05
Supplement: Supplementary file 10 [file 5e6f2676f21db370b905c565.xlsx]

## Sheet: Table 5
Table 5. Timing of hospital course and patient follow-up.
	Foot Fracture	No Foot Fracture	Responders	Nonresponders	All Patients	P-Value (Foot Fracture vs. No Foot Fracture)	P-Value (Responders vs. Nonresponders)
Days From Injury To Flap Placement	10.5 ± 4.4	17.5 ± 8.8	16.1 ± 8.5	18.5 ± 13.9	17.7 ± 12.4	0.05*	0.41
Days From Injury To Physical Therapy Initiation	15.5 ± 6.0	24.9 ± 9.7	23.0 ± 9.8	23.4 ± 14.0	23.3 ± 3.5	0.04*	0.89
Months From Injury To Survey	26.0 ± 8.4	50.1 ± 26.0	45.5 ± 25.5	59.7 ± 28.4	54.9 ± 28.1	0.01*	0.05
