# Supplementary material for: Foot fracture may predict poor patient reported functional outcomes in lower extremity reconstruction of the traumatically injured lower extremity: A case-control study.
Source: Research Square preprint supplement (doi:10.21203/rs.3.rs-455697/v1), 2021-05-05
Supplement: Supplementary file 11 [file 67f0459fd75055e87d46ac18.xlsx]

## Sheet: Table 3
Table 3. Characteristics of flaps used across all patients that participated in the LEFS and SF36 questionnaires.
	Foot Fracture	No Foot Fracture	Responders	Nonresponders	All Patients	P-Value (Foot Fracture vs. No Foot Fracture)	P-Value (Responders vs. Nonresponders)
Free Flaps	4 (100%)	11 (58%)	15 (65%)	21 (46%)	36 (52%)	0.26	0.2
Rectus Abdominus Myocutaneous	2 (50%)	2 (11%)	4 (17%)	4 (9%)	8 (12%)	0.12	0.43
Latissimus	2 (50%)	4 (21%)	6 (26%)	8 (17%)	14 (20%)	0.27	0.53
Gracilis	0 (0%)	2 (11%)	2 (9%)	2 (4%)	4 (6%)	1	0.6
ALT	0 (0%)	3 (16%)	3 (13%)	6 (13%)	9 (13%)	1	1
Vastus Lateralis	0 (0%)	0 (0%)	0 (0%)	1 (2%)	1 (1%)	N/A	1
Local Flaps	0 (0%)	8 (42%)	8 (35%)	25 (54%)	33 (48%)	0.26	0.2
Gastrocnemeus	0 (0%)	7 (37%)	7 (30%)	8 (17%)	15 (22%)	0.27	0.23
Soleus	0 (0%)	1 (5%)	1 (4%)	14 (30%)	15 (22%)	1	0.01*
Tibialis Anterior	0 (0%)	0 (0%)	0 (0%)	1 (2%)	1 (1%)	N/A	1
Unknown	0 (0%)	0 (0%)	0 (0%)	2 (4%)	2 (3%)	N/A	0.55
Flap Loss	0 (0%)	2 (5%)	2 (4%)	1 (4%)	3 (4%)	1	0.26
