# Supplementary material for: Foot fracture may predict poor patient reported functional outcomes in lower extremity reconstruction of the traumatically injured lower extremity: A case-control study.
Source: Research Square preprint supplement (doi:10.21203/rs.3.rs-455697/v1), 2021-05-05
Supplement: Supplementary file 12 [file c6c481bdeecde8ffaabd53d2.xlsx]

## Sheet: Table 7
Table 7. SF36 (v2) functional outcomes scores across all patients with foot fractures and no foot fracture, in comparison to all respondants to the survey.
SF 36 Component	Foot Fracture	No Foot Fracture	All Responders	P-Value
Physical Function	18.8 ± 11.1	41.2 ± 25.5	36.9 ± 24.9	0.02*
Role Physical	1.6 ± 3.1	25.7 ± 36.6	21.1 ± 34.1	0.02*
Body Pain	49.8 ± 17.9	47.2 ± 25.5	47.7 ± 23.9	0.82
General Health	48.5 ± 14.8	48.5 ± 15.8	48.5 ± 15.3	1
Social Functioning	43.8 ± 16.1	49.3 ± 10.3	48.2 ± 11.4	0.55
Role Emotional	12.5 ± 14.4	35.8 ± 38.4	31.3 ± 36.0	0.07
Mental Health	30.0 ± 9.1	30.3 ± 17.7	30.2 ± 16.2	0.96
Vitality	68.8 ± 7.2	58.1 ± 20.3	60.1 ± 19.7	0.11
